# Glycoinositolphospholipids from *Leishmania braziliensis* and *L. infantum*: Modulation of Innate Immune System and Variations in Carbohydrate Structure

Rafael Ramiro Assis<sup>1,2</sup>, Izabela Coimbra Ibraim<sup>1</sup>, Fátima Soares Noronha<sup>2</sup>, Salvatore Joseph Turco<sup>3</sup>, Rodrigo Pedro Soares<sup>1\*</sup>

**1** Centro de Pesquisas René Rachou, Fundação Oswaldo Cruz - FIOCRUZ, Belo Horizonte, Brazil, **2** Departamento de Microbiologia, Universidade Federal de Minas Gerais, Belo Horizonte, Brazil, **3** Department of Biochemistry, University of Kentucky Medical Center, Lexington, Kentucky, United States of America

## Abstract

The essential role of the lipophosphoglycan (LPG) of *Leishmania* in innate immune response has been extensively reported. However, information about the role of the LPG-related glycoinositolphospholipids (GIPLs) is limited, especially with respect to the New World species of *Leishmania*. GIPLs are low molecular weight molecules covering the parasite surface and are similar to LPG in sharing a common lipid backbone and a glycan motif containing up to 7 sugars. Critical aspects of their structure and functions are still obscure in the interaction with the vertebrate host. In this study, we evaluated the role of those molecules in two medically important South American species *Leishmania infantum* and *L. braziliensis*, causative agents of visceral (VL) and cutaneous Leishmaniasis (CL), respectively. GIPLs derived from both species did not induce NO or TNF- $\alpha$  production by non-primed murine macrophages. Additionally, primed macrophages from mice (BALB/c, C57BL/6, TLR2-/- and TLR4-/-) exposed to GIPLs from both species, with exception to TNF- $\alpha$ , did not produce any of the cytokines analyzed (IL1- $\beta$ , IL-2, IL-4, IL-5, IL-10, IL-12p40, IFN- $\gamma$ ) or p38 activation. GIPLs induced the production of TNF- $\alpha$  and NO by C57BL/6 mice, primarily via TLR4. Pre incubation of macrophages with GIPLs reduced significantly the amount of NO and IL-12 in the presence of IFN- $\gamma$  or lipopolysaccharide (LPS), which was more pronounced with *L. braziliensis* GIPLs. This inhibition was reversed after PI-specific phospholipase C treatment. A structural analysis of the GIPLs showed that *L. infantum* has manose rich GIPLs, suggestive of type I and Hybrid GIPLs while *L. braziliensis* has galactose rich GIPLs, suggestive of Type II GIPLs. In conclusion, there are major differences in the structure and composition of GIPLs from *L. braziliensis* and *L. infantum*. Also, GIPLs are important inhibitory molecules during the interaction with macrophages.

**Citation:** Assis RR, Ibraim IC, Noronha FS, Turco SJ, Soares RP (2012) Glycoinositolphospholipids from *Leishmania braziliensis* and *L. infantum*: Modulation of Innate Immune System and Variations in Carbohydrate Structure. PLoS Negl Trop Dis 6(2): e1543. doi:10.1371/journal.pntd.0001543

**Editor:** Charles L. Jaffe, Hebrew University-Hadassah Medical School, Israel

**Received:** July 4, 2011; **Accepted:** January 11, 2012; **Published:** February 28, 2012

**Copyright:** © 2012 Assis et al. This is an open-access article distributed under the terms of the Creative Commons Attribution License, which permits unrestricted use, distribution, and reproduction in any medium, provided the original author and source are credited.

**Funding:** R. P. Soares is a research fellow supported by Conselho Nacional de Pesquisa e Desenvolvimento (CNPq) (#305042/2010-6 and #471465/2009-7), Tropical Diseases Research-World Health Organization (ID A50880). R. R. Assis is supported by Fundação de Amparo à Pesquisa do Estado de Minas Gerais (FAPEMIG). S. J. Turco is supported by National Institutes of Health (NIH), USA (AI31078). I. C. Ibraim is supported by Coordenação de Aperfeiçoamento de Pessoal de Nível Superior (CAPES). The funders had no role in study design, data collection and analysis, decision to publish or preparation of the manuscript.

**Competing Interests:** The authors have declared that no competing interests exist.

\* E-mail: rsoares@cpqrr.fiocruz.br

## Introduction

In the Americas, Leishmaniasis are widely distributed from the southern United States to northern parts of Argentina [1]. In Latin America, especially in Brazil, *Leishmania braziliensis* and *Leishmania infantum* are the causative agents of cutaneous (CL) and visceral leishmaniasis (VL), respectively. The severity of the disease may range from self-healing cutaneous ulcers to potentially lethal visceral form [2].

During the life cycle, *Leishmania* parasites have to survive to extreme adverse conditions in both vertebrate and invertebrate hosts [3]. In the vertebrate host, inoculation of metacyclic *Leishmania* promastigotes by the sand fly is followed by neutrophil phagocytosis prior to intracellular differentiation into amastigotes [4]. At the early steps of infection, innate cellular microbicidal mechanisms may include the production of reactive nitrogen intermediates (RNI), reactive oxygen intermediates (ROI) and cytokines (IL-12, TNF- $\alpha$  and IFN- $\gamma$ ) [5,6]. This is crucial for Th1 polarization and subsequent parasite control in the mouse model.

Failure in this process can lead to higher parasite burden and increase severity of disease [7].

To avoid destruction, intracellular parasites must interfere with the cytotoxic signaling system of the host. *In vivo* and *in vitro* studies have demonstrated the importance of nitric oxide (NO) production in response to several stimuli such as bacterial lipopolysaccharide (LPS), IFN- $\gamma$  and TNF- $\alpha$  [8]. It is known that *Leishmania*-infected macrophages fail to activate MAPKs, become less responsive to cytokine stimulation (IL-12 and IFN- $\gamma$ ) [9,10,11] and express lower amounts of iNOS and IL-12 [12,13], impairing T CD4+ cell differentiation to a TH1 phenotype.

The molecular mechanisms involved in the immune system modulation by *Leishmania* have been the focus of many studies. GPI-anchored molecules are closely associated with cell signaling and can act as agonists and second messengers in response to cytokines and other stimuli [9,14,15,16]. The most studied *Leishmania* glycoconjugate is lipophosphoglycan (LPG), whose functions include: attachment and entry into macrophages [17], modulation of NO production [18], inhibition of protein kinase C

## Author Summary

*Leishmania infantum* (syn. *L. chagasi*) and *L. braziliensis* are the causative agents of VL and CL, respectively, in the New World. A vital part of the parasite's life cycle involves the circumvention of the host immune system and the infection of macrophages. This work focused on an important class of surface glycoconjugates, the glycoinositolphospholipids (GIPLs), and their role in the interaction with murine macrophages. GIPLs are expressed on every stage of the parasite life cycle and are the most abundant molecules on its surface. Here we show that these molecules modulate many macrophage functions such as cytokine production, release of nitric oxide and differentially activate MAPK. Although the GIPLs of both New World species are capable of modulating the same mechanisms, they do so to different degrees requiring an examination of their glycan composition. We show that *L. infantum* synthesizes mannose rich GIPLs whereas *L. braziliensis* express galactose rich GIPLs.

(PKC) dependent cell activation [19,20], retardation of phagosome maturation [21], disruption of NADPH oxidase assembly at the phagosome membrane [22], induction of neutrophil extracellular traps (NETs) [23], induction of protein kinase R (PKR) [24], and attachment to the sand fly vector midgut [25]. In *Leishmania*, Toll-like receptor 2 (TLR2) is the main receptor for both LPG and glycoinositolphospholipids (GIPLs), the latter as a less potent agonist [26,27]. Besides TLR2, *in vivo* studies have also demonstrated the importance of TLR4 and TLR9 during *Leishmania* infection [28,29,30].

Little is known about the functions of GIPLs in *Leishmania* biology, although they are present as the major component of the parasite surface in numbers greater than LPG [31]. The basic GIPL structure is a Man $\alpha$ 1-4GlcN linked to an alkyl-acylglycerol through a phosphatidylinositol (PI) residue. Polymorphism in this family of molecules relies on the variety of fatty acid substitutions in the lipid anchor and monosaccharide substitutions in the glycan core moiety, leading to their classification into three groups (Figure 1): Type-I GIPLs are characterized by having an  $\alpha$ 1,6-mannose residue linked to the Man $\alpha$ 1-4GlcN motif. This group is represented by M2 and M3 GIPLs which structures are Man $\alpha$ 1-6Man $\alpha$ 1-4GlcN-PI and Man $\alpha$ 1-2 Man $\alpha$ 1-6Man $\alpha$ 1-4GlcN-PI. Type I GIPLs are closely related to GPI anchors of proteins with a very homogeneous lipid composition, predominantly C<sub>18:0</sub> fatty acids, and are found in Old World species such as *L. donovani*, *L. tropica* and *L. aethiopia* promastigotes [32]. Type-II GIPLs have a much more heterogeneous lipid composition with C<sub>18:0</sub>, C<sub>22:0</sub>, C<sub>24:0</sub> and C<sub>26:0</sub> fatty acids. They can be found in Old World *L. major* [33,34] and New World *L. mexicana* [35,36] and *L. panamensis* [36]. Type II GIPLs are characterized by having an  $\alpha$ 1,3-mannose residue linked to the Man $\alpha$ 1-4GlcN motif, similarly to the glycan core of LPG. Structurally, they can range from small iM2 GIPL, Man $\alpha$ 1-3Man $\alpha$ 1-4GlcN-PI, to longer structures like GIPL-A, Gal $\beta$ 1-3Gal $\alpha$ 1-3Gal $\beta$ 1-3Man $\alpha$ 1-3Man $\alpha$ 1-4GlcN-PI and GIPL-3, Gal $\alpha$ 1-6Gal $\alpha$ 1-3Gal $\beta$ 1-3Man $\alpha$ 1-3Man $\alpha$ 1-4GlcN-PI. The third group is the Hybrid-type GIPLs, sharing common features to both Type-I and II with mannose residues located on both C-3 and C-6 positions of the Man $\alpha$ 1-4GlcN motif (isoM3 and isoM4). There may be also other substitutions like phosphate sugars and ethanolamine residues [35,37]. Early studies have shown that GIPLs from *L. major* were highly antigenic, being recognized by sera from chronic CL patients [38]. Recent findings have demonstrated that *L. braziliensis* GIPLs are components of complex

membrane microdomains and that these structures were crucial for parasite infectivity and survival [39]. However, little is known about the role of GIPLs in the innate immune compartment, especially in *L. braziliensis* and *L. infantum*.

This work is part of a wider study on the glycobiology of New World species of *Leishmania*. In previous studies, we reported on the LPGs of *L. braziliensis* and *L. infantum* [40,41] and showed that the differences in LPG structures were relevant in the parasite biology. In this study, we expanded those findings and show the GIPL structures of the two New World Leishmanias also differentially modulate the innate immune system in mouse peritoneal macrophages.

## Materials and Methods

All animals were handled in strict accordance with good animal practice as defined by the Internal Ethics Committee in Animal Experimentation (CEUA) of Fundação Oswaldo Cruz (FIO-CRUZ), Belo Horizonte (BH), Minas Gerais (MG), Brazil (Protocol P-0297-06). Knock-out mice handling protocol was approved by the National Commission of Biosafety (CTNBio) (protocol #01200.006193/2001-16).

## Parasites

World Health Reference strains of *L. braziliensis* (MHOM/BR/1975/M2903), *L. infantum* (MHOM/BR/1974/PP75) and *L. donovani* (MHOM/SD/00/1S-2D) were used. Promastigotes were cultured in M199 medium supplemented with 10% heat-inactivated fetal bovine serum (FBS), penicillin 100 units/ml, streptomycin 50  $\mu$ g/ml, 12.5 mM glutamine, 0.1 M adenine, 0.0005% hemin, and 40 mM Hepes, pH 7.4 at 26°C [40].

## Extraction and purification of GIPLs

Cells were harvested and washed in PBS twice prior to GIPLs extraction with methanol:chloroform:water (10:10:3). This material was dried under nitrogen stream, resuspended on 0.1 M ammonium acetate buffer containing 5% 1-propanol and loaded onto an octyl-sepharose column (80 ml) equilibrated in the same buffer. The column was subjected to a gradient of 1-propanol in 0.1 M ammonium acetate buffer (5–60%). Three mL fractions were collected and the presence of GIPLs in the fractions was detected by staining aliquots of the fractions on a TLC plate with orcinol:sulfuric acid (100°C, 5 min) [34]. GIPLs containing fractions were pooled, dried and resuspended in endotoxin-free water (Sanobiol, São Paulo, Brazil). GIPLs concentrations determined as described elsewhere [42]. Prior to use on *in vitro* macrophage cultures, GIPLs were diluted in fresh RPMI.

## Purification of murine peritoneal macrophages and cell culture

Thioglycollate-elicited peritoneal macrophages were removed from BALB/c, C57BL/6 and respective TLR2 $^{-/-}$  and TLR4 $^{-/-}$  knockouts by peritoneal washing with RPMI and enriched by plastic adherence for 18 h. Cells ( $3 \times 10^5$  cells/well) were cultured in RPMI, 2 mM glutamine, 50 U/ml of penicillin and 50  $\mu$ g/mL streptomycin in 96-well culture plates (37°C/5% CO<sub>2</sub>). They were incubated with gamma interferon (IFN- $\gamma$ ) (100 IU/mL) [43], live stationary *Leishmania* parasites (10:1), GIPLs (1, 5, 10 and 25  $\mu$ g/mL) and lipopolysaccharide (LPS) (100  $\mu$ g/mL).

## Cytokine and nitrite measurements

For CBA multiplex cytokine detection, cells were plated as described above for 1 h before washing with RMPI without

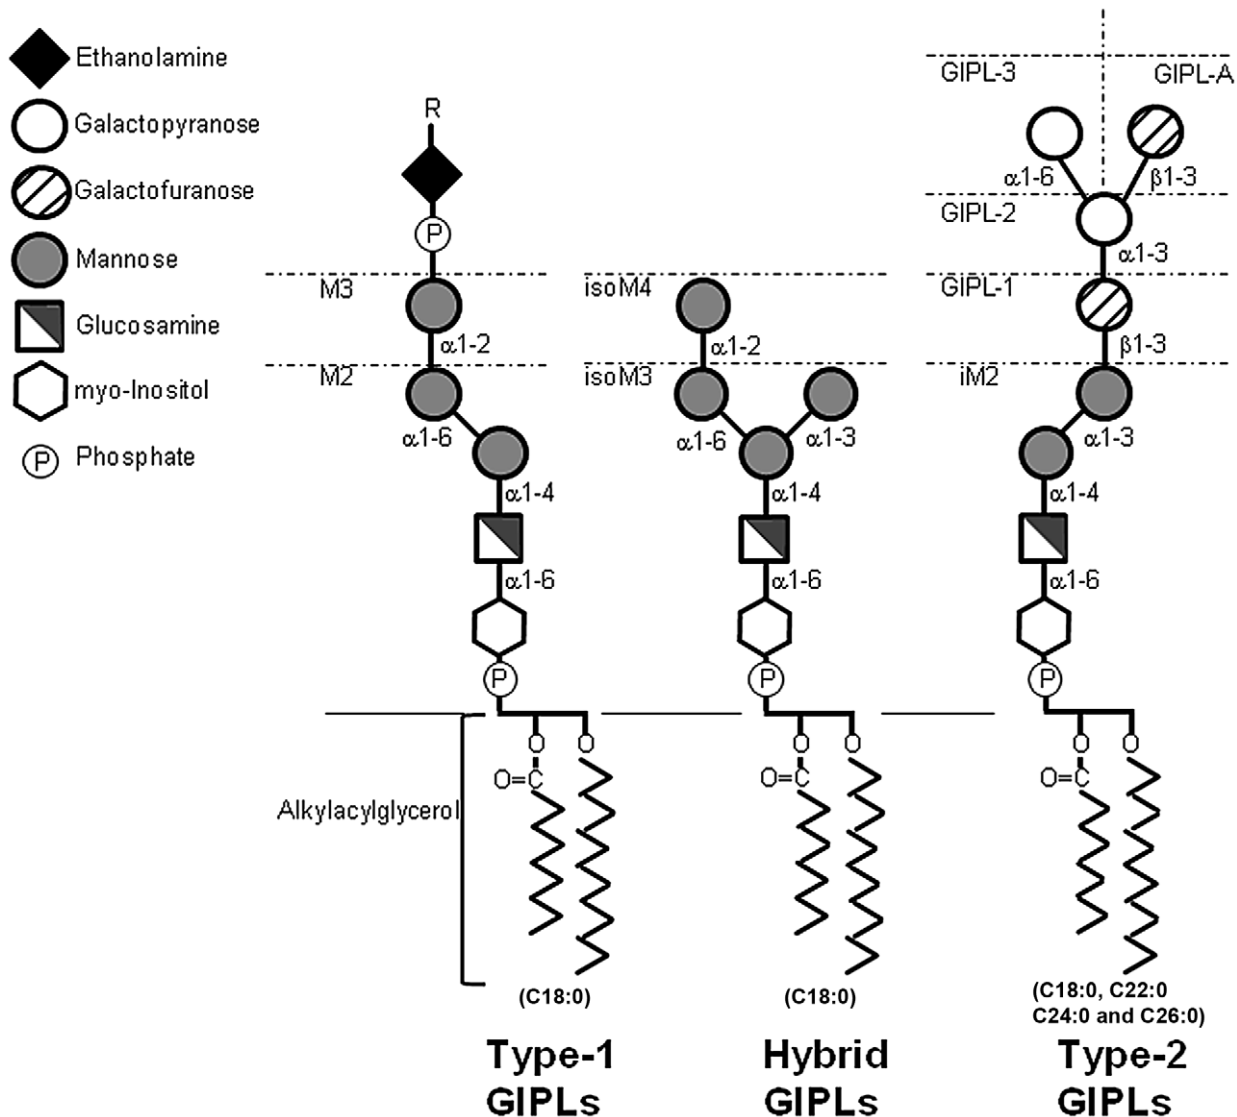

**Figure 1. Types of GIPLs.** For information on M2, M3, iM2, GIPL-A, isoM3 and isoM4, see introduction. Fatty acid chains vary in different GIPL species: The predominant type fatty acid in Type-1 and Hybrid GIPLs is C<sub>18:0</sub>; in type-2 GIPLs the predominant lipids are C<sub>18:0</sub>, C<sub>22:0</sub>, C<sub>24:0</sub> and C<sub>26:0</sub>. "R" in Type 1 GIPLs represent a protein linked to the GIPL structure by an ethanolamine phosphate residue (e.g. gp63 surface metalloprotease) [31,78]. doi:10.1371/journal.pntd.0001543.g001

serum. RPMI supplemented with 10% FBS was added with (for primed macrophages) or without (for non-primed macrophages) the addition of IFN- $\gamma$  (3 IU/mL) [44] and incubated for 18 h (37°C, 5% CO<sub>2</sub>). GIPLs (25  $\mu$ g/mL) and LPS (100 ng/mL) were added and incubated for 48 h. Supernatants were collected and stored at -70°C and cytokines (IL1- $\beta$ , IL-2, IL-4, IL-5, IL-10, IL-12p40, IFN- $\gamma$  and TNF- $\alpha$ ) were determined using the BD CBA Mouse Cytokine assay kits according to the manufacturer's specifications (BD Biosciences, CA, USA). Flow cytometric measurements were performed on a FACS Calibur flow cytometer (Becton Dickinson, Mountain View, CA). Cell-Quest<sup>TM</sup> software package provided by the manufacturer was used for data acquisition and the FlowJo software 7.6.4 (Tree Star Inc., Ashland, OR, USA) was used for data analysis. A total of 1,800 events were acquired for each preparation. Results are representative of two experiments in duplicate.

For inhibition studies, cell suspensions were washed with RPMI and enriched by plastic adherence for 18 h as described

above without the addition of IFN- $\gamma$ . Cells were pre-incubated with GIPLs (15 min) prior to stimulation with LPS or IFN- $\gamma$ . Supernatants were collected after 24 h for NO, TNF- $\alpha$  and IL-12 measurements. When used, LPS or IFN- $\gamma$  were added 15 min after the addition of GIPLs. Culture supernatants were collected and nitrite concentrations determined by Griess reaction [45] and TNF- $\alpha$  and IL-12 concentrations were determined using ELISA (BD). Results are representative of two experiments in triplicate.

#### PI-specific phospholipase-C treatment (PI-PLC)

To evaluate whether intact GIPL structure is required for activity. Purified GIPLs were resuspended in 150  $\mu$ l CHAPS buffer (298 mg HEPES, 47 mg EDTA and 50 mg CHAPS in 50 ml endotoxin-free water) and 2 U of PI-PLC (Sigma) (37°C, 16 h). Peritoneal macrophages were plated and stimulated with intact and PI-PLC treated GIPLs as described above. Nitrite content was measured on the supernatants by Griess reaction [45].

### Preparation of cell lysates and immunoblotting

Stimulated cells ( $3 \times 10^6$ /sample) were washed with ice-cold PBS, lysed in lysis buffer (20 mM Tris-HCl pH 7.5, 1% Triton X-100, 1 mM sodium orthovanadate, 1 mM phenylmethylsulfonyl fluoride (PMSF), 50 mM sodium fluoride, 150 mM NaCl, 5 mM ethylenediamine tetraacetic acid (EDTA), 10% Glycerol (v/v), 0.5 mM dithiothreitol (DTT) and protease inhibitor cocktail from Sigma®). Cells were harvested with a plastic scraper and centrifuged at  $13,000 \times g$  ( $4^\circ\text{C}$ , 10 min). Supernatants were transferred to fresh tubes and stored at  $-20^\circ\text{C}$  until used. Cell lysates were resolved by SDS-PAGE, transferred to a nitrocellulose membrane and blocked (5% milk in TBS-0.1% Tween 20) for 1 h. Primary Abs (anti dually phosphorylated ERK, dually phosphorylated p38 and Total ERK, 1:1,000) were incubated for 16 h at  $4^\circ\text{C}$ . Membranes were washed ( $3 \times 10$  min) with TBS-0.1% Tween 20 and incubated 1 h with anti-mouse IgG conjugated with peroxidase (1:10,000). The reaction was visualized using luminol.

### Nitrous acid deamination

Purified GIPLs were delipidated by nitrous acid deamination (300  $\mu\text{l}$  of 0.5 M sodium acetate and 300  $\mu\text{l}$  of 0.5 M  $\text{NaNO}_2$ ) for 16 h at  $37^\circ\text{C}$  [40]. Samples were dried, resuspended in 0.1N HAc/0.1M HCl and applied to a phenyl-sepharose column (1 mL). The sugar headgroups were eluted using 0.1N HAc/0.1M HCl. After washing column with 2 volumes of water, lipids and unreacted GIPLs were eluted using Solvent E ( $\text{H}_2\text{O}$ /ethanol/diethyl ether/pyridine/ $\text{NH}_4\text{OH}$ ; 15:15:5:1:0.017) [46].

### Gel filtration

To desalt, deaminated GIPLs glycan headgroups were applied to Sephadex G-25 ( $1 \times 5$  cm) columns equilibrated with 10 ml of water. Eluted deaminated glycan headgroups were collected in 0.5 ml fractions, checked for the presence of salt using silver nitrate and dried in Speed-Vac [40].

### Strong acid hydrolysis

To obtain depolymerized neutral monosaccharides, deaminated glycan headgroups were subjected to strong acid hydrolysis (2N trifluoroacetic acid, 3 h,  $100^\circ\text{C}$ ) and dried in Speed-Vac. To remove acid, 500  $\mu\text{l}$  of toluene were added to samples, homogenized using vortex and evaporated twice under  $\text{N}_2$ . Samples were resuspended in 500  $\mu\text{l}$  of water and desalted by ion exchanging chromatography.

### Ion exchange chromatography

To remove salt from neutral monosaccharides, dried depolymerized neutral monosaccharides were diluted in 500  $\mu\text{l}$  of  $\text{H}_2\text{O}$  and applied onto a column containing AG1-X8 acetate form over AG50W-X12 resins. Samples were eluted with 5 mL of water and dried in a Speed-Vac instrument [47].

### Thin layer chromatography (TLC)

Intact and deaminated GIPLs were chromatographed on TLC Silica Gel 60 plates (Merck). To compare rough GIPL content of *L. braziliensis*, *L. infantum* and as reference *L. donovani*. Intact GIPLs were chromatographed in 1-butanol:methanol:water (4:4:3 v/v) for 20 h. To access Deamination by nitrous acid sensitivity, GIPLs were subjected to nitrous acid deamination as described above and resolved in chloroform:methanol:13M ammonium hydroxide:1M ammonium acetate:water (180:140:9:9:23 v/v) for 20 h. Bands were visualized as described above [46,48].

### Fluorophore-assisted carbohydrate electrophoresis (FACE)

To access the oligosaccharide composition, deaminated GIPLs headgroups were fluorescently labeled with 0.05 N ANTS (8-aminonaphthalene-1,3,6-trisulfate) and 1 M cyanoborohydride ( $37^\circ\text{C}$ , 16 h). To determine the monosaccharide composition of the GIPLs, depolymerized and desalted monosaccharides were fluorescently labeled with 0.1 M AMAC (2-aminoacridone) in 5% acetic acid and 1 M cyanoborohydride. Labeled sugars were subjected to FACE and the gel was visualized under UV light. Oligoglucose ladders ( $\text{G}_1$ – $\text{G}_7$ ) and monosaccharides (D-galactose, D-glucose and D-mannose) (Sigma) were used as standards for oligosaccharides and monosaccharide gels, respectively [47,49].

### HPLC

Desalted monosaccharides were separated using a DX-500 HPLC (Dionex Corp.) with ED40 electrochemical detection. Samples were run on a CarboPac PA10 column ( $4 \times 250$  mm) in the presence of 18 mM NaOH (flow rate 1 mL/min, 2000 psi). D-galactose, D-glucose and D-mannose (100  $\mu\text{g}/\text{mL}$ ) were used as standards.

### Statistical analyses

For nitrite and cytokine measurements, the Shapiro–Wilk test was conducted to test the null hypothesis that data were sampled from a Gaussian distribution [50]. The P value ( $P > 0.05$ ) showed that data did not deviate from Gaussian distribution. For this reason, student's "t" test and ANOVA were performed to test equality of population medians among groups and independent samples. Data were analysed using GraphPad Prism 5.0 software (Graph Prism Inc., San Diego, CA) and  $P < 0.05$  was considered significant.

## Results

### Nitrite and cytokine production

To determine whether GIPLs from both *L. braziliensis* and *L. infantum* are able to induce the production of nitrite, peritoneal macrophages were incubated with live promastigotes (10:1) or treated with different concentrations of GIPLs (1 to 25  $\mu\text{g}/\text{mL}$ ) with IFN- $\gamma$  serving as positive control (100 IU/mL). Neither of the purified GIPLs could induce any detectable increase in the production of nitric oxide (NO) in primed BALB/c macrophages (Figure 2) nor the production of the cytokines tested (IL-1- $\beta$ , IL-2, IL-4, IL-5, IL-10, IL-12p40, IFN- $\gamma$  and TNF- $\alpha$ ) in non-primed macrophages in all other mice lineages (data not shown). No NO production was detected in non-primed macrophages of BALB/c, C57BL/6, TLR2 $^{-/-}$  and TLR4 $^{-/-}$  mice (data not shown) and in BALB/c primed macrophages (Figure 3A). A higher NO production was detected on C57BL/6 IFN- $\gamma$ -primed macrophages stimulated with GIPLs and live promastigotes when compared to BALB/c mice ( $P < 0.001$ ). There was a significant NO production in primed C57BL/6 and TLR2 $^{-/-}$  macrophages stimulated with GIPLs in comparison to TLR4 $^{-/-}$  ( $P < 0.01$ ) (Figure 3A) suggesting the involvement of TLR4 in this activation. Also, a slight reduction of NO production was noticed in macrophages from TLR2 $^{-/-}$  mice stimulated with live promastigotes when compared to C57BL/6 ( $P < 0.04$ ). This reduction may indicate the participation of other parasite molecules that are recognized by TLR2 such as the LPG. The LPG is known to be a potent agonist of TLR2 and is capable of inducing the production of cytokines (IL-12, IFN- $\gamma$  and TNF- $\alpha$ ) in macrophages and NK cells [26,27]. Differently from NO, TNF- $\alpha$  production was higher in BALB/c

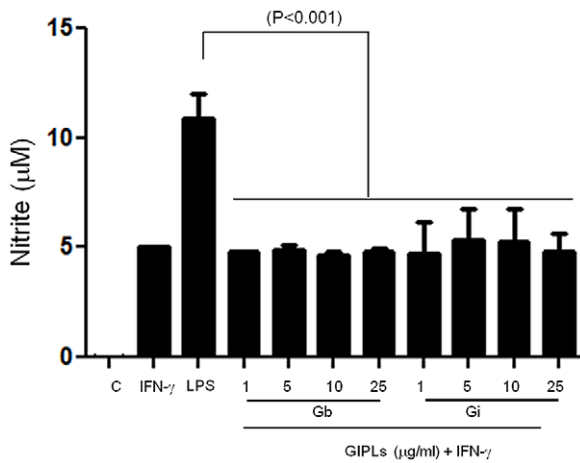

**Figure 2. Nitrite production by BALB/c primed macrophages after stimulation with different concentrations of GIPLs.** C, negative control; IFN-γ, gamma-interferon; LPS, lipopolysaccharide; Gb, *L. braziliensis* GIPLs; Gi, *L. infantum* GIPLs. Cells were primed with IFN-γ (3 IU/ml) for 18 h prior to the addition of the GIPLs or LPS (positive control). Non primed cells and primed cells without the addition of a new stimulus were also used as controls. ANOVA test was performed and P<0.05 was considered significant. Results are the representation of three experiments in triplicate. doi:10.1371/journal.pntd.0001543.g002

mice than in C57BL/6 (P<0.05) in response to the stimulation of GIPLs from both species. Similarly this production was higher in TLR2 (-/-) than TLR4 (-/-) (P<0.02). This data also indicate

a slight TLR4 involvement in TNF-α production. In both WT macrophages, the TNF-α production was higher after stimulation with GIPLs in comparison to live promastigotes (Figure 3B) (P<0.01). A lower TNF-α production was noticed in TLR2 (-/-) suggesting the involvement of TLR2 in this process.

GIPLs did not induce the production of any of the cytokines tested (IL1-β, IL-2, IL-4, IL-5, IL-10, IL-12p40 and IFN-γ) in BALB/c, C57BL/6, TLR2 (-/-) and TLR4 (-/-) mice (data not shown). In all experiments, live parasites from both species induced cytokine production close to background levels (Figure 3B and data not shown). These results suggest that GIPLs are able to activate NO in C57BL/6 mice and TNF-α in either BALB/c or C57BL/6 during the early steps of infection, and were not able to stimulate most of the cytokines assayed.

**Inhibition of nitrite and IL-12 production in BALB/c macrophages pre-exposed to GIPLs**

Compared to LPG, GIPLs had a less potent agonistic activity to stimulate nitrite and cytokine production in previous studies [27]. To test if this pattern was due to inhibition and/or lack of activation, thioglycollate elicited peritoneal macrophages were pre-incubated with GIPLs prior to stimulation with IFN-γ or LPS. A strong inhibition (aprox. 42%) of NO production stimulated by IFN-γ was observed for *L. infantum* GIPLs and was almost completely abolished for *L. braziliensis* (P<0.01) (Figure 4A). A similar response was observed for LPS and this inhibition was more pronounced in *L. braziliensis* (P<0.001) (Figure 4B). Pre-incubation with GIPLs was also able to inhibit approximately 65% of IL-12, but not TNF-α production (Figures 4C and D). These results indicate an inhibitory role of GIPLs.

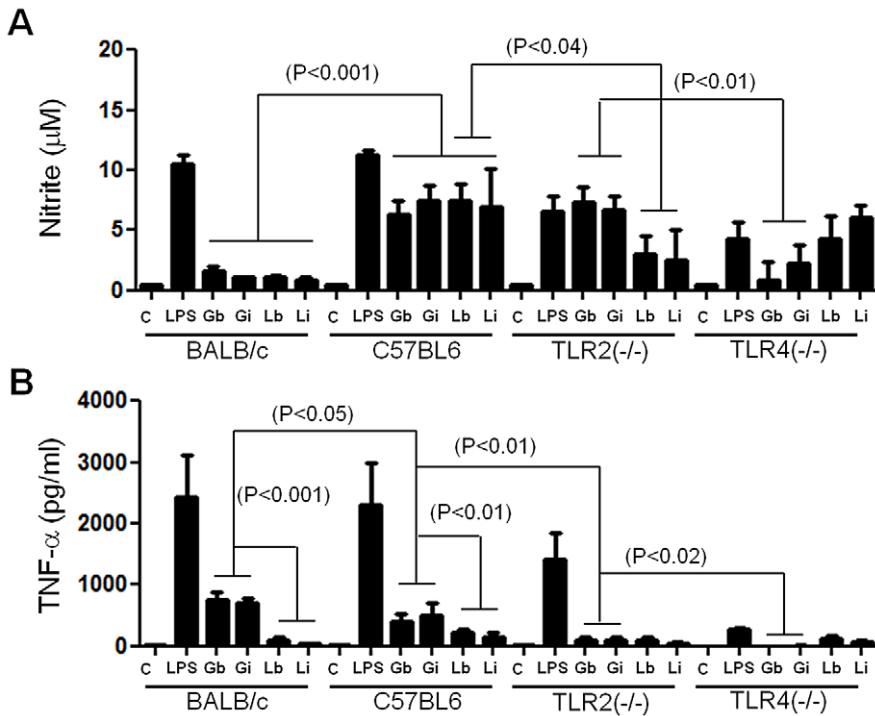

**Figure 3. Nitrite and TNF-α production by primed macrophages after stimulation with GIPLs and parasites.** C, negative control; Gb, *L. braziliensis* GIPLs; Gi, *L. infantum* GIPLs; Lb, *L. braziliensis* live promastigotes and Li, *L. infantum* live promastigotes. Cells were pre-incubated with IFN-γ (3 IU/ml) for 18 h then 25 µg/mL of GIPLs or 100 ng/mL of LPS was added. Supernatants were collected 48 hours later, in (A) NO concentrations were measured by Griess reaction and in (B) TNF-α concentrations determined by flow cytometry. ANOVA test was performed and P<0.05 was considered significant. doi:10.1371/journal.pntd.0001543.g003

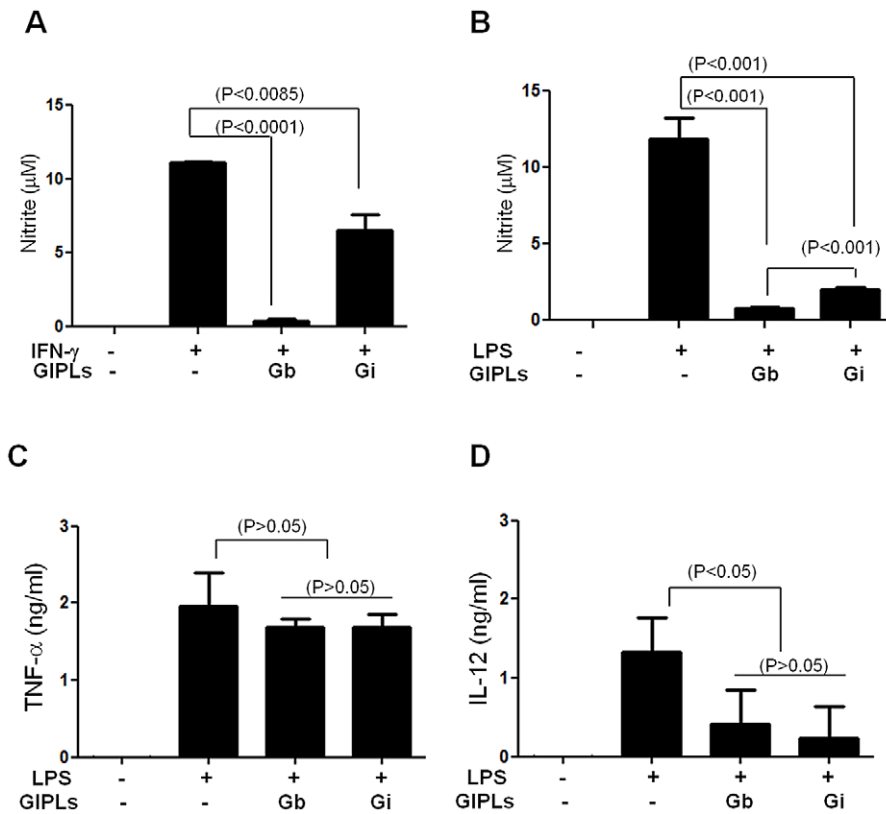

**Figure 4. Modulation of nitrite, TNF- $\alpha$  and IL-12 production by *Leishmania* GIPLs in BALB/c macrophages.** Cells were incubated with GIPLs (25  $\mu$ g/ml) from *L. braziliensis* (Gb) and *L. infantum* (Gi) for 15 min prior to stimulation with IFN- $\gamma$  (100 IU/ml) (A) or LPS (100 ng/ml) (B). Nitrite content was measured by Griess reaction; TNF- $\alpha$  and IL-12 concentrations were measured by ELISA. P<0.05 was considered significant. Results are the representation of three experiments. doi:10.1371/journal.pntd.0001543.g004

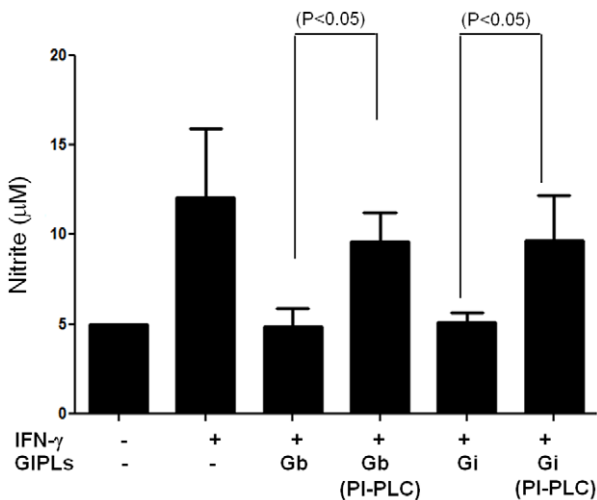

**Figure 5. Modulation of nitrite production by macrophages stimulated with intact and PI-PLC treated GIPLs.** Mouse peritoneal macrophages were incubated with GIPLs (25  $\mu$ g/ml) from *L. braziliensis* (Gb), *L. infantum* (Gi), PI-PLC treated *L. braziliensis* GIPLs (Gb PI-PLC) and *L. infantum* PI-PLC treated GIPLs (Gi PI-PLC) for 15 min prior to stimulation with IFN- $\gamma$  (100 IU/ml). Nitrite content was measured by Griess reaction on the supernatants after 24 h. Student "t" test was performed and P<0.05 was considered significant. Results are the mean of two experiments. doi:10.1371/journal.pntd.0001543.g005

Also, to test whether the intact structure of GIPLs is required for its inhibitory activity Macrophages were incubated with intact and PI-PLC treated GIPLs. As shown on Figure 5 PI-PLC treated GIPLs failed to inhibit NO production by IFN- $\gamma$  stimulated cells.

#### Activation of MAPKs

Since GIPLs were strong inhibitors of cytokine production, we investigated whether those molecules could modulate MAPKs activation. Mouse peritoneal macrophages were previously incubated with GIPLs and MAPK activation was detected using western blot. No significant activation of p38 and only a minimal induction of ERK were observed. Also when cells were preincubated with GIPLs prior to stimulation with LPS, there was a reduction on the phosphorylation of both ERK and p38 (Figure 6). Densitometer analysis normalized by total-ERK expression detected an 18% and 17.5% decrease on ERK activation for *L. braziliensis* and *L. infantum*, respectively. For p38 this inhibition was 16.5% and 33%, respectively.

#### Preliminary characterization of *L. braziliensis* and *L. infantum* GIPLs

Due to the interspecific differences in the intensity of NO and IL-12 production inhibition (Figures 4) and MAPKs activation (Figure 6), we examined whether those variations could be due to polymorphisms in GIPLs structure and composition. Intact GIPLs were resolved on TLC plates and the GIPL profile differed between the two species (Figure 7A). *Leishmania braziliensis* exhibited slower migrating GIPLs compared to *L. infantum*, whose

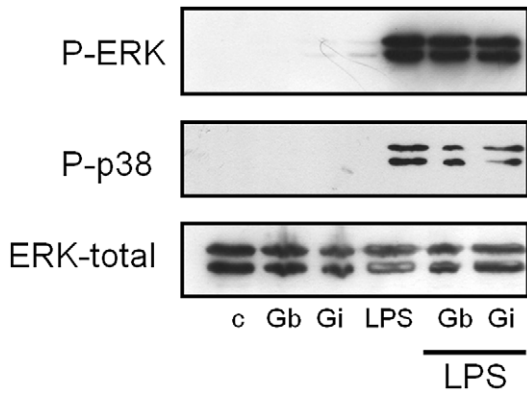

**Figure 6. Activation of MAPKs (ERK and p38) by *Leishmania* GIPLs in BALB/c peritoneal macrophages.** Mouse peritoneal macrophages were stimulated for 30 min with 25 µg/mL of GIPLs. Dually phosphorylated MAPKs were detected by western blot. C, negative control; Gb, *L. braziliensis* GIPLs and Gi, *L. infantum* GIPLs. Also cells were incubated with GIPLs prior to stimulation with LPS; total ERK content as a normalizing protein.  
doi:10.1371/journal.pntd.0001543.g006

profile was very similar to *L. donovani* [32] with three main bands co-migrating with isoM2, isoM3 and isoM4. In *L. braziliensis*, the three faster bands co-migrated with bands isoM2, isoM3 and isoM4 of *L. donovani*. All bands were susceptible to nitrous acid deamination, and this is consistent with the presence in the GIPLs of a non-N-substituted glucosamine residue (Figure 7B), a hallmark of *Leishmania* GIPLs anchors [51].

To better determine sizes of the glycan portions, purified GIPLs were deaminated and desalted. The carbohydrate portions were reductively labeled with a fluorophore and then subjected to FACE. Consistent with the TLC data (Figure 7), the carbohydrate portions of the GIPLs from *L. braziliensis* were larger exhibiting up to 8–9 sugars while those from *L. infantum* and *L. donovani* consisted of up to 4–5 sugars (Figure 8).

To access sugar composition, GIPLs were subjected to strong acid hydrolysis and the resulting monosaccharides were analysed

by FACE and HPLC (Figure 9A and B). Consistent with the TLC data (Figure 7A), the monosaccharide composition of *L. infantum* GIPLs was very similar to the GIPLs from *L. donovani* (Figure 9A). The relative amounts of galactose, glucose and mannose (calculated by the relative peak areas on HPLC) were determined (Figure 9B). Supporting our other findings and GIPL assignments, the GIPLs from *L. infantum* had higher concentrations of mannose (82%), followed by galactose (12%) and glucose (6%). This indicates that these are mostly Type I or hybrid GIPLs, whose structure bears a terminal mannose, but a small proportion of Type II GIPLs (terminated in galactose) is probably present. On the other hand, *L. braziliensis* GIPLs had higher galactose content (42%), followed by, mannose (30%) and glucose (28%), thus suggesting a Type II GIPL structure.

**Discussion**

Infection with protozoan parasites remains a prominent problem in different parts of the world having a major impact on public health in the developing countries. Leishmaniasis are considered by World Health Organization [52] as one of the major six important infectious diseases worldwide. This class of parasitic diseases currently affects over 12 million people all around the world, up to 1.5 million new individuals developing the visceral and tegumentar disease respectively each year. In Brazil, most of those cases are caused by *L. infantum* and *L. braziliensis*, respectively.

The question of how parasites interact with hosts cells to promote infection and survival has been the focus of interest for a long time. In order to survive in the macrophage cells, *Leishmania* has to prevent or inhibit a variety of intracellular mechanisms of parasite killing, one of which is dependent on ROS and RNI [53,54]. However, RNI alone is effective for controlling visceral Leishmaniasis [55].

Parasite surface molecules, especially the LPG, have long been known to play an important role in the host parasite interactions [17,27,56]. In this work, we focused on another class of glycoconjugates, the GIPLs in two New World species of *Leishmania* with different known immunopathologies. These molecules are abundantly present on the parasite surface in

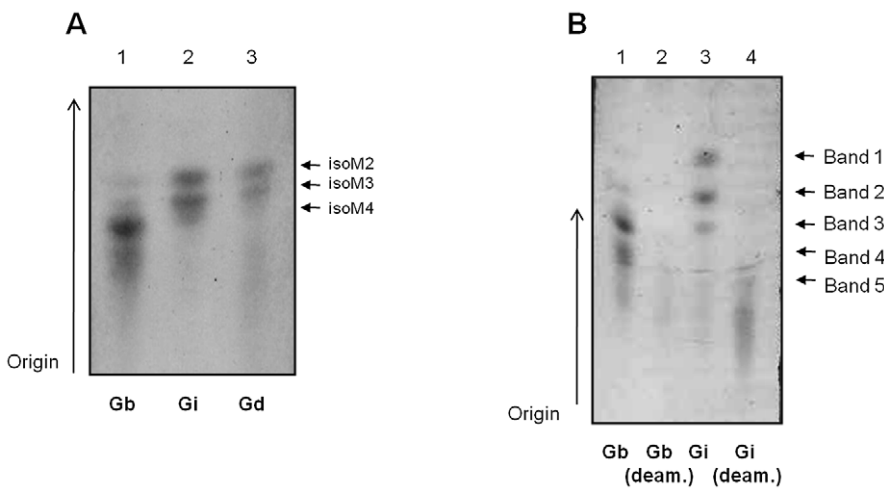

**Figure 7. Thin layer chromatography (TLC) of *Leishmania* glycoinositolphospholipids (GIPLs).** (A) Purified intact GIPLs: Lane 1, *L. braziliensis* GIPLs (Gb); lane 2, *L. infantum* GIPLs (Gi) and lane 3, *L. donovani* GIPLs (Gd). The assignments for *L. donovani* structures are: isoM2 as Man $\alpha$ 1-3Man $\alpha$ 1-4GlcN-PI; isoM3 as Man $\alpha$ 1-6(Man $\alpha$ 1-3)Man $\alpha$ 1-4GlcN-PI and isoM4 as Man $\alpha$ 1-2Man $\alpha$ 1-6(Man $\alpha$ 1-3)Man $\alpha$ 1-4GlcN-PI [32]. LPG, lipophosphoglycan; GPI, glycosyl phosphatidylinositol. (B) Deaminated GIPLs. Lane 1, *L. braziliensis* untreated GIPLs (Gb); lane 2, deaminated *L. braziliensis* GIPLs (Gb deam.); lane 3, *L. infantum* untreated GIPLs (Gi) and Lane 4, deaminated *L. infantum* GIPLs (Gi deam.).  
doi:10.1371/journal.pntd.0001543.g007

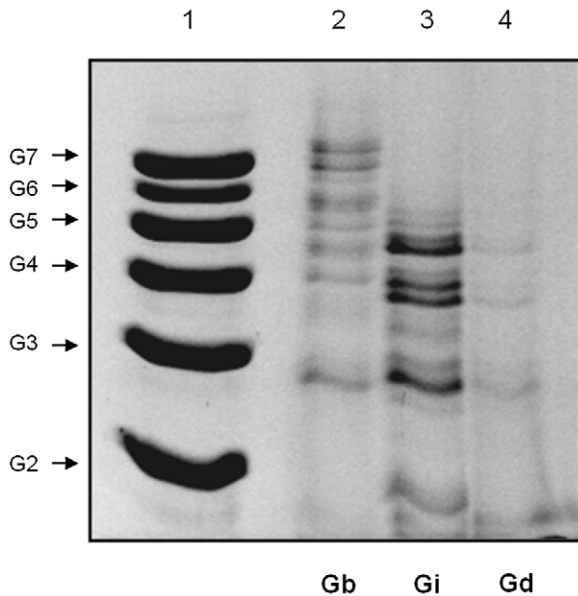

**Figure 8. Fluorophore-assisted carbohydrate electrophoresis (FACE) of *Leishmania* GIPLs.** Lane 1, oligoglucose ladder represented by G2–G7; lane 2, *L. braziliensis* GIPLs (Gb) and lane 3, *L. infantum* GIPLs (Gi) and lane 4, *L. donovani* GIPLs (Gd). doi:10.1371/journal.pntd.0001543.g008

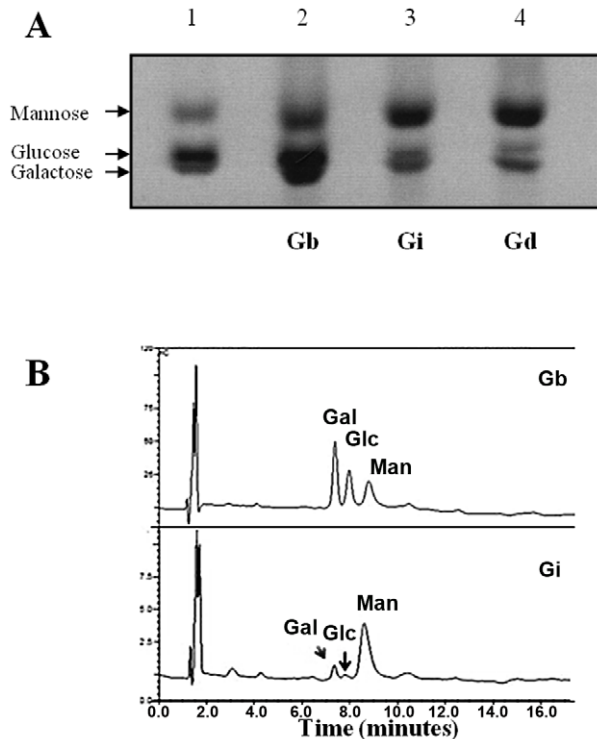

**Figure 9. Monosaccharide profile of *Leishmania* glycoinositol-phospholipids (GIPLs).** (A) Fluorophore-assisted carbohydrate electrophoresis (FACE). Lane 1, standards represented by galactose, glucose and mannose (100  $\mu$ g/ml); lane 2, *L. braziliensis* GIPLs (Gb); lane 3, *L. infantum* GIPLs (Gi) and Lane 4, *L. donovani* GIPLs (Gd). (B) High performance liquid chromatography (HPLC). Gal, galactose; Glc, glucose and Man, mannose. doi:10.1371/journal.pntd.0001543.g009

numbers great than  $10^7$ . Recently, they have been found associated to lipid rafts, essential for parasite infectivity and selective modulation of the host cell response [39]. In fact, there are several indications that GIPLs and other GPI-anchored molecules participate in cell signaling and are involved in the assembly of the NADPH oxidase complex, NO production [16,57,58,59,60] and inhibition of LPS and TNF- $\alpha$  induced *c-fos* gene expression by macrophages [61]. Also synthetic LPG, whose GPI anchor is structurally similar to GIPLs, can stimulate ERK activation and therefore inhibit IL-12 synthesis by macrophages [9].

Previous studies have demonstrated GIPLs antigenicity in chronic patients infected with *L. major* [38,62]. However, information concerning the biological relevance of GIPLs at early steps of infection in the innate immune compartment was still limited. Here, we demonstrated that GIPLs from both New World species were not able to activate the production of NO in non-primed macrophages, which was similar to published data from Old World species [59,60]. In primed macrophages an initial NO and TNF- $\alpha$  production was detected. Further, GIPLs differentially inhibited NO production even in the presence of IFN- $\gamma$  and LPS, two major NO inducers. Previous studies indicated that LPG was a more potent agonist than GIPLs for the induction of pro-inflammatory cytokines [26,27]. In general, in comparison to LPS, GIPLs induced a lower production of NO and TNF- $\alpha$ . Also, they exhibited a strong inhibitor pattern during NO and cytokine induction, especially IL-12.

Similar strategy was demonstrated using crude extracts of the rat tapeworm *Hymenolepis diminuta*, although using different pathways. As shown by Johnston *et al.* (2010) [63], crude extracts of this tapeworm could inhibit the production of TNF- $\alpha$  and IL-6 by mouse and human macrophages stimulates with TLR agonists poly(I:C) and *Flagellin*. These extracts also protected mice from experimental colitis accompanied by enhanced IL-10 and IL-4 production.

*In vivo* studies using Old World species of *Leishmania* have demonstrated the importance of TLRs and other components of the innate immune system during infection. MyD88 is the most common adaptor molecule for the activation of NF- $\kappa$ B in most TLRs [28]. Also many studies using gene knockout have shown the importance of TLR and MyD88 adaptor molecule for cytokine production [29], IL-1 promoter activation [64], IFN- $\gamma$  and IL-12 production [65].

NF- $\kappa$ B activation through TLR2 [26], elastase dependent neutrophil control of *L. amazonensis* promastigotes [66], and ultimately parasite control and lesion healing [27,65,67].

Indeed, in primed macrophages, GIPLs from both New World species were able to stimulate the production of NO, and this induction was mostly via TLR4 and to a lesser extent TLR2 (Figure 3A). However, no difference was observed while stimulating with live parasites.

Interestingly, in the *L. braziliensis* model, the TLR2 receptor plays a much more regulatory role in dendritic cells, repressing IL-12p40 and promoting IL-10 expression. This observation is correlated with sustained IFN- $\gamma$  production and enhanced parasite control in TLR2 (–/–) mice [68]. However, in macrophages exposed to GIPLs, this difference in NO expression between TLR2 (–/–) and TLR4 (–/–) strains was not due to IL-12, IFN- $\gamma$  or IL-10 production (Figures 3B and 4). Also this induction was more pronounced in C57BL/6 than in BALB/c this was expected since C57BL/6 derived macrophages tend to be more responsive to stimuli than BALB/c macrophages [69]. These data are in accord with previous studies showing that related GIPLs from *Trypanosoma cruzi* are able to activate TLR4 [70] and studies with



Old World species of *Leishmania* being able to activate TLR2, TLR3, TLR4 and TLR9 [28]. With exception to TNF- $\alpha$ , GIPLs and live parasites from *L. braziliensis* and *L. infantum* were not able to induce the other cytokines studied (IL-1 $\beta$ , IL-2, IL-4, IL-5, IL-10, IL-12p40 and IFN- $\gamma$ ) in primed and non-primed macrophages (data not shown). Thus, we conclude that the GIPLs from these two New World species are less potent agonists or strong inhibitors for macrophages and the data presented here supports that the later might be true.

When pre incubated with GIPLs, a strong inhibition of both NO and IL-12 production was observed (Figures 4C and D). This inhibitory effect seems to be in specific pathways since no significant inhibition was detected for TNF- $\alpha$  (Figure 4C). This inhibition is dependent on the intact structure of GIPLs since PI-PLC digested GIPLs that have its glycan core detached from its lipid anchor, failed to inhibit NO production by IFN- $\gamma$  stimulated macrophages (Figure 5). Also, regarding TNF- $\alpha$ , only WT mice were able to trigger the production of this cytokine and this production was very low for TLR2 (-/-) and completely absent in TLR4 (-/-) (Figure 3B). These data supports the premise that NF- $\kappa$ B translocation is not affected by GIPLs exposure [71]. It is noteworthy that the inhibition of IL-12 is not due to production of IL-10, because we observed no IL-10 production either in unprimed (data not shown) or in primed macrophages incubated with GIPLs (Data not shown).

In TLR signaling, the most common adaptor molecule is MyD88 but other adaptor molecules may be involved in NF- $\kappa$ B translocation such as mitogen-activated protein kinases (JNK or p38) [72]. Early studies showed that the *Leishmania* LPG can inhibit IL-12 without affecting NF- $\kappa$ B translocation to the nucleus [9]. For maximal downstream activation and GPI-induced gene expression, a full activation and cooperation Protein Tyrosine Kinase (PTK) and Protein Kinase C (PKC) are required. Although iM4 *L. mexicana* GIPL stimulated rapid PTK phosphorylation it failed in activating PKC [16]. In fact the unusual glycolipid composition (mostly alkyl-acyl-glycerol) of *Leishmania* GIPLs inhibits the activations of PKC [58,73]. This is in accordance with our observations that GIPLs not only fail on inducing a pro-inflammatory response in non-macrophages but also that the GIPLs inhibit the productions of IL-12 and NO.

Also we tested whether GIPLs from both New World species were able modulate the phosphorylation of MAPKs. We observed that the GIPLs activate only ERK, whereas LPS activated both ERK and p38 (Figure 6). Also we observed that the GIPLs can prevent the phosphorylation of both ERK and p38 MAPKs stimulated by LPS. However, ERK activation was too low to provide evidence for any further effect on IL-12 production. It is likely that *L. braziliensis* and *L. infantum* GIPLs have a profound effect on macrophage cell signaling affecting PTKs, PKCs and MAPKs, and that GIPLs from both species use similar pathways but differ in the intensity in which they modulate NO and IL-12 production.

In this work, GIPLs interacted with primed macrophages resulting only in the production of NO and TNF- $\alpha$ . GIPLs are abundant in the amastigote stage of *Leishmania* and are associated to highly specialized microdomains [39] and the participation of each kind of GIPL on the process is still under debate [74,75,76]. Also it is possible that the dependency on a particular glycolipid may vary throughout species and life cycle stage. The data presented here clearly supports the hypothesis that *Leishmania* GIPLs, differently from other trypanosomatids, may contribute to build a safer environment to promote infection by manipulating macrophage function and by disrupting the polarization of TH1/TH2 response, through inhibiting IL-12 production during the

initial stages of infection and manipulate macrophage for parasite survival.

In general, LPGs and GIPLs share similar lipid anchor moieties among the various species of *Leishmania* and the integrity of this portion is important for TLR2 activation [27]. To ascertain if the differences in the inhibition of NO and IL-12 production could be related to polymorphisms in GIPL structure, we analyzed the carbohydrate core of *L. braziliensis* and *L. infantum* GIPLs. Previous studies from our group showed that the phosphoglycan domains of LPGs from *L. braziliensis* and *L. infantum* differ in structure and composition [40,41] and differences in glycan portions of GIPLs were also observed in this study. The iM2 species of GIPLs possesses the structure Man $\alpha$ 1-3Man $\alpha$ 1-4GlcN-P) similar to LPG core region, and isoM3 has a hybrid glycan in GIPLs (substitutions on both the third and sixth carbons of the distal mannose) with the structure of Man $\alpha$ 1-6(Man $\alpha$ 1-3Man $\alpha$ 1-4GlcN-PI. Our structural observations indicated that the GIPLs from *L. infantum* are similar to the known structures in *L. donovani* [32] and are composed mainly of mannose residues. This data suggests that the majority of these GIPLs as Type I GIPLs and Hybrid GIPLs. On the other hand, *L. braziliensis* GIPLs shows a different profile of sugar composition and different bands distinguishable on TLC (Figure 7A). We determined that there was a stoichiometric ratio of galactose and mannose in the glycan portion of these GIPLs. This data suggest that these GIPLs are similar to the closely related species *L. panamensis* [36], which have a common Gal $\beta$ 1-3Man $\alpha$ 1-3Man $\alpha$ 1-4GlcN-myoinositol glycan headgroup and a structurally related to LPG lipid anchor, suggestive of Type II GIPLs. Type II GIPLs can be very diverse and substitutions on the 3<sup>rd</sup> carbon of the Gal $\beta$  residue by Gal $\alpha$ -1, Gal $\alpha$ 1-3gal $\alpha$ 1, and even longer saccharides like Man $\alpha$ 1-PO<sub>4</sub>-6Gal $\alpha$ 1-6Gal $\alpha$ 1 can be detected in other species like *L. major* [31]. These substitutions can lead to large GIPLs containing up to 7, 8 or even more hexoses [34,36], which we observed from the *L. braziliensis* GIPLs as seen on Figure 8.

In conclusion, GIPLs from both New World species *L. infantum* and *L. braziliensis* have a strong inhibitory potential during intracellular *Leishmania* infection of the mammalian host. Only an initial production of NO and TNF- $\alpha$  was detected after stimulation by GIPLs. Due to their importance in modulating NO and cytokine production, these molecules could be possible targets to alternative immunological and chemotherapeutic control methods. The preliminary qualitative analysis of GIPLs from these two species showed that they differ in composition and structures thus, suggesting that the structural distinctions could be responsible for differential NO and IL-12 inhibition in macrophages. Also, GIPLs were also capable of affecting macrophage ability to produce NO in the presence of IFN- $\gamma$  and LPS. These data, together with already published data from other groups, suggest that GIPLs may be involved in the interaction with the macrophage triggering a minimal pro-inflammatory response in the host and to the benefit of the parasite. Glycoconjugate interspecies polymorphisms, not only in the GIPLs, but also in LPG, gp63 and other GPI-anchored molecules could be important for differential establishment of infection. These polymorphisms could result in different clinical outcomes, such as those shown by *L. infantum* and *L. braziliensis*, causative agents of a visceral and tegumentary forms, respectively [77].

## Acknowledgments

We thank Dr. A. M. Silva (UFMG) and Dr. C. Toscano (CPqRR/FIOCUZ) for helpful suggestions during preparation of manuscript and Dr. M. N. Melo (UFMG) for support.

## Author Contributions

Conceived and designed the experiments: RPS SJT FSN. Performed the experiments: RRA ICI. Analyzed the data: RRA ICI FSN SJT RPS.

Contributed reagents/materials/analysis tools: RPS SJT. Wrote the paper: RRA ICI FSN SJT RPS.

## References

1. Grimaldi G, Jr., Tesh RB, McMahon-Pratt D (1989) A review of the geographic distribution and epidemiology of leishmaniasis in the New World. *Am J Trop Med Hyg* 41: 687–725.
2. Herwaldt BL (1999) Leishmaniasis. *Lancet* 354: 1191–1199.
3. Sacks D, Kamhawi S (2001) Molecular aspects of parasite-vector and vector-host interactions in leishmaniasis. *Annu Rev Microbiol* 55: 453–483.
4. Peters NC, Sacks DL (2009) The impact of vector-mediated neutrophil recruitment on cutaneous leishmaniasis. *Cell Microbiol* 11: 1290–1296.
5. Evans TG, Thai L, Granger DL, Hibbs JB, Jr. (1993) Effect of in vivo inhibition of nitric oxide production in murine leishmaniasis. *J Immunol* 151: 907–915.
6. Gazzinelli RT, Ropert C, Campos MA (2004) Role of the Toll/interleukin-1 receptor signaling pathway in host resistance and pathogenesis during infection with protozoan parasites. *Immunol Rev* 201: 9–25.
7. Bogdan C, Rollinghoff M (1998) The immune response to *Leishmania*: mechanisms of parasite control and evasion. *Int J Parasitol* 28: 121–134.
8. Oswald IP, James SL (1996) Nitrogen Oxide in Host Defense against Parasites. *Methods* 10: 8–14.
9. Feng GJ, Goodridge HS, Harnett MM, Wei XQ, Nikolaev AV, et al. (1999) Extracellular signal-related kinase (ERK) and p38 mitogen-activated protein (MAP) kinases differentially regulate the lipopolysaccharide-mediated induction of inducible nitric oxide synthase and IL-12 in macrophages: *Leishmania* phosphoglycans subvert macrophage IL-12 production by targeting ERK MAP kinase. *J Immunol* 163: 6403–6412.
10. Himmelrich H, Parra-Lopez C, Tacchini-Cottier F, Louis JA, Launois P (1998) The IL-4 rapidly produced in BALB/c mice after infection with *Leishmania major* down-regulates IL-12 receptor beta 2-chain expression on CD4+ T cells resulting in a state of unresponsiveness to IL-12. *J Immunol* 161: 6156–6163.
11. Matte C, Descoteaux A (2010) *Leishmania donovani* amastigotes impair gamma interferon-induced STAT1alpha nuclear translocation by blocking the interaction between STAT1alpha and importin-alpha5. *Infect Immun* 78: 3736–3743.
12. Ajizian SJ, English BK, Meals EA (1999) Specific inhibitors of p38 and extracellular signal-regulated kinase mitogen-activated protein kinase pathways block inducible nitric oxide synthase and tumor necrosis factor accumulation in murine macrophages stimulated with lipopolysaccharide and interferon-gamma. *J Infect Dis* 179: 939–944.
13. Salmon RA, Guo X, Teh HS, Schrader JW (2001) The p38 mitogen-activated protein kinases can have opposing roles in the antigen-dependent or endotoxin-stimulated production of IL-12 and IFN-gamma. *Eur J Immunol* 31: 3218–3227.
14. Merida I, Pratt JC, Gaulton GN (1990) Regulation of interleukin 2-dependent growth responses by glycosylphosphatidylinositol molecules. *Proc Natl Acad Sci U S A* 87: 9421–9425.
15. Saitli AR (1991) The role of glycosyl-phosphoinositides in hormone action. *J Bioenerg Biomembr* 23: 29–41.
16. Tachado SD, Gerold P, Schwarz R, Novakovic S, McConville M, et al. (1997) Signal transduction in macrophages by glycosylphosphatidylinositols of *Plasmodium*, *Trypanosoma*, and *Leishmania*: activation of protein tyrosine kinases and protein kinase C by inositolglycan and diacylglycerol moieties. *Proc Natl Acad Sci U S A* 94: 4022–4027.
17. Descoteaux A, Turco SJ (1999) Glycoconjugates in *Leishmania* infectivity. *Biochim Biophys Acta* 1455: 341–352.
18. Brittingham A, Mosser DM (1996) Exploitation of the complement system by *Leishmania* promastigotes. *Parasitol Today* 12: 444–447.
19. Descoteaux A, Turco SJ, Sacks DL, Matlashewski G (1991) *Leishmania donovani* lipophosphoglycan selectively inhibits signal transduction in macrophages. *J Immunol* 146: 2747–2753.
20. Olivier M, Brownsey RW, Reiner NE (1992) Defective stimulus-response coupling in human monocytes infected with *Leishmania donovani* is associated with altered activation and translocation of protein kinase C. *Proc Natl Acad Sci U S A* 89: 7481–7485.
21. Winberg ME, Holm A, Sarndahl E, Vinet AF, Descoteaux A, et al. (2009) *Leishmania donovani* lipophosphoglycan inhibits phagosomal maturation via action on membrane rafts. *Microbes Infect* 11: 215–222.
22. Lodge R, Diallo TO, Descoteaux A (2006) *Leishmania donovani* lipophosphoglycan blocks NADPH oxidase assembly at the phagosome membrane. *Cell Microbiol* 8: 1922–1931.
23. Guimaraes-Costa AB, Nascimento MT, Froment GS, Soares RP, Morgado FN, et al. (2009) *Leishmania amazonensis* promastigotes induce and are killed by neutrophil extracellular traps. *Proc Natl Acad Sci U S A* 106: 6748–6753.
24. de Carvalho Vivarini A, Pereira RD, Dias Teixeira KL, Calegari-Silva TC, Bellio M, et al. (2011) Human cutaneous leishmaniasis: interferon-dependent expression of double-stranded RNA-dependent protein kinase (PKR) via TLR2. *Faseb J*.
25. Kamhawi S, Ramalho-Ortigao M, Pham VM, Kumar S, Lawyer PG, et al. (2004) A role for insect galectins in parasite survival. *Cell* 119: 329–341.
26. Becker I, Salaiza N, Aguirre M, Delgado J, Carrillo-Carrasco N, et al. (2003) *Leishmania* lipophosphoglycan (LPG) activates NK cells through toll-like receptor-2. *Mol Biochem Parasitol* 130: 65–74.
27. de Veer MJ, Curtis JM, Baldwin TM, DiDonato JA, Sexton A, et al. (2003) MyD88 is essential for clearance of *Leishmania major*: possible role for lipophosphoglycan and Toll-like receptor 2 signaling. *Eur J Immunol* 33: 2822–2831.
28. Tuon FF, Amato VS, Bacha HA, Almusawi T, Duarte MI, et al. (2008) Toll-like receptors and leishmaniasis. *Infect Immun* 76: 866–872.
29. Schleicher U, Liese J, Knippertz I, Kurzmann C, Hesse A, et al. (2007) NK cell activation in visceral leishmaniasis requires TLR9, myeloid DCs, and IL-12, but is independent of plasmacytoid DCs. *J Exp Med* 204: 893–906.
30. Kropf P, Freudenberg MA, Modolell M, Price HP, Herath S, et al. (2004) Toll-like receptor 4 contributes to efficient control of infection with the protozoan parasite *Leishmania major*. *Infect Immun* 72: 1920–1928.
31. McConville MJ, Ferguson MA (1993) The structure, biosynthesis and function of glycosylated phosphatidylinositols in the parasitic protozoa and higher eukaryotes. *Biochem J* 294(Pt 2): 305–324.
32. McConville MJ, Blackwell JM (1991) Developmental changes in the glycosylated phosphatidylinositols of *Leishmania donovani*. Characterization of the promastigote and amastigote glycolipids. *J Biol Chem* 266: 15170–15179.
33. McConville MJ, Thomas-Oates JE, Ferguson MA, Homans SW (1990) Structure of the lipophosphoglycan from *Leishmania major*. *J Biol Chem* 265: 19611–19623.
34. Proudfoot L, Schneider P, Ferguson MA, McConville MJ (1995) Biosynthesis of the glycolipid anchor of lipophosphoglycan and the structurally related glycoinositolphospholipids from *Leishmania major*. *Biochem J* 308(Pt 1): 45–55.
35. McConville MJ, Collidge TA, Ferguson MA, Schneider P (1993) The glycoinositol phospholipids of *Leishmania mexicana* promastigotes. Evidence for the presence of three distinct pathways of glycolipid biosynthesis. *J Biol Chem* 268: 15595–15604.
36. Zawadzki J, Scholz C, Currie G, Coombs GH, McConville MJ (1998) The glycoinositolphospholipids from *Leishmania panamensis* contain unusual glycan and lipid moieties. *J Mol Biol* 282: 287–299.
37. McConville MJ, Bacic A (1989) A family of glycoinositol phospholipids from *Leishmania major*. Isolation, characterization, and antigenicity. *J Biol Chem* 264: 757–766.
38. McConville MJ, Homans SW, Thomas-Oates JE, Dell A, Bacic A (1990) Structures of the glycoinositolphospholipids from *Leishmania major*. A family of novel galactofuranose-containing glycolipids. *J Biol Chem* 265: 7385–7394.
39. Yoneyama KA, Tanaka AK, Silveira TG, Takahashi HK, Straus AH (2006) Characterization of *Leishmania (Viannia) braziliensis* membrane microdomains, and their role in macrophage infectivity. *J Lipid Res* 47: 2171–2178.
40. Soares RP, Macedo ME, Ropert C, Gontijo NF, Almeida IC, et al. (2002) *Leishmania chagasi*: lipophosphoglycan characterization and binding to the midgut of the sand fly vector *Lutzomyia longipalpis*. *Mol Biochem Parasitol* 121: 213–224.
41. Soares RP, Cardoso TL, Barron T, Araujo MS, Pimenta PF, et al. (2005) *Leishmania braziliensis*: a novel mechanism in the lipophosphoglycan regulation during metacyclogenesis. *Int J Parasitol* 35: 245–253.
42. Dubois M, Gilles K, Hamilton JK, Rebers PA, Smith F (1951) A colorimetric method for the determination of sugars. *Nature* 168: 167.
43. Kolodziej H, Radtke OA, Kiderlen AF (2008) Stimulus (polyphenol, IFN-gamma, LPS)-dependent nitric oxide production and antileishmanial effects in RAW 264.7 macrophages. *Phytochemistry* 69: 3103–3110.
44. Hu X, Herrero C, Li WP, Antoniv TT, Falck-Pedersen E, et al. (2002) Sensitization of IFN-gamma/Jak-STAT signaling during macrophage activation. *Nat Immunol* 3: 859–866.
45. Drapier JC, Wietzerbin J, Hibbs JB, Jr. (1988) Interferon-gamma and tumor necrosis factor induce the L-arginine-dependent cytotoxic effector mechanism in murine macrophages. *Eur J Immunol* 18: 1587–1592.
46. Orlandi PA, Jr., Turco SJ (1987) Structure of the lipid moiety of the *Leishmania donovani* lipophosphoglycan. *J Biol Chem* 262: 10384–10391.
47. Coelho-Finamore JM, Freitas VC, Assis RR, Melo MN, Novozhilova N, et al. *Leishmania infantum*: Lipophosphoglycan intraspecific variation and interaction with vertebrate and invertebrate hosts. *Int J Parasitol* 41: 333–342.
48. Schneider P, Ralton JE, McConville MJ, Ferguson MA (1993) Analysis of the neutral glycan fractions of glycosyl-phosphatidylinositols by thin-layer chromatography. *Anal Biochem* 210: 106–112.
49. Soares RP, Barron T, McCoy-Simandle K, Svobodova M, Warburg A, et al. (2004) *Leishmania tropica*: intraspecific polymorphisms in lipophosphoglycan correlate with transmission by different *Phlebotomus* species. *Exp Parasitol* 107: 105–114.
50. Shapiro SS, Wilk MB (1965) An analysis of variance test for normality (complete samples). *Biometrika* 52: 591–611.

51. Ferguson MA (1999) The structure, biosynthesis and functions of glycosylphosphatidylinositol anchors, and the contributions of *trypanosome* research. *J Cell Sci* 112(Pt 17): 2799–2809.
52. WHO website. Available: <http://www.who.int/leishmaniasis/en/index.html>. Accessed 2012 Jan 23.
53. Murray HW (1982) Cell-mediated immune response in experimental visceral leishmaniasis. II. Oxygen-dependent killing of intracellular *Leishmania donovani* amastigotes. *J Immunol* 129: 351–357.
54. Murray HW (1990) Effect of continuous administration of interferon-gamma in experimental visceral leishmaniasis. *J Infect Dis* 161: 992–994.
55. Murray HW, Nathan CF (1999) Macrophage microbicidal mechanisms in vivo: reactive nitrogen versus oxygen intermediates in the killing of intracellular visceral *Leishmania donovani*. *J Exp Med* 189: 741–746.
56. de Assis RR, Ibrahim IC, Nogueira PM, Soares RP, Turco SJ (2012) Glycoconjugates in New World species of *Leishmania*: Polymorphisms in lipophosphoglycan and glycoinositolphospholipids and interaction with hosts. *Biochim Biophys Acta*; in press.
57. Lodge R, Descoteaux A (2006) Phagocytosis of *Leishmania donovani* amastigotes is Rac1 dependent and occurs in the absence of NADPH oxidase activation. *Eur J Immunol* 36: 2735–2744.
58. Chawla M, Vishwakarma RA (2003) Alkylacylglycerolipid domain of GPI molecules of *Leishmania* is responsible for inhibition of PKC-mediated c-fos expression. *J Lipid Res* 44: 594–600.
59. Proudfoot L, O'Donnell CA, Liew FY (1995) Glycoinositolphospholipids of *Leishmania major* inhibit nitric oxide synthesis and reduce leishmanicidal activity in murine macrophages. *Eur J Immunol* 25: 745–750.
60. Proudfoot L, Nikolaev AV, Feng GJ, Wei WQ, Ferguson MA, et al. (1996) Regulation of the expression of nitric oxide synthase and leishmanicidal activity by glycoconjugates of *Leishmania* lipophosphoglycan in murine macrophages. *Proc Natl Acad Sci U S A* 93: 10984–10989.
61. Descoteaux A, Matlashewski G, Turco SJ (1992) Inhibition of macrophage protein kinase C-mediated protein phosphorylation by *Leishmania donovani* lipophosphoglycan. *J Immunol* 149: 3008–3015.
62. McConville MJ (1991) Glycosylated-phosphatidylinositols as virulence factors in *Leishmania*. *Cell Biol Int Rep* 15: 779–798.
63. Johnston MJ, Wang A, Catarino ME, Ball L, Phan VC, et al. (2010) Extracts of the rat tapeworm, *Hymenolepis diminuta*, suppress macrophage activation in vitro and alleviate chemically induced colitis in mice. *Infect Immun* 78: 1364–1375.
64. Hawn TR, Ozinsky A, Underhill DM, Buckner FS, Akira S, et al. (2002) *Leishmania major* activates IL-1 alpha expression in macrophages through a MyD88-dependent pathway. *Microbes Infect* 4: 763–771.
65. Muraile E, De Trez C, Brait M, De Baetselier P, Leo O, et al. (2003) Genetically resistant mice lacking MyD88-adaptor protein display a high susceptibility to *Leishmania major* infection associated with a polarized Th2 response. *J Immunol* 170: 4237–4241.
66. Ribeiro-Gomes FL, Moniz-de-Souza MC, Alexandre-Moreira MS, Dias WB, Lopes MF, et al. (2007) Neutrophils activate macrophages for intracellular killing of *Leishmania major* through recruitment of TLR4 by neutrophil elastase. *J Immunol* 179: 3988–3994.
67. Lange UG, Mastroeni P, Blackwell JM, Stober CB (2004) DNA-Salmonella enterica serovar Typhimurium primer-booster vaccination biases towards T helper 1 responses and enhances protection against *Leishmania major* infection in mice. *Infect Immun* 72: 4924–4928.
68. Vargas-Inchaustegui DA, Tai W, Xin L, Hogg AE, Corry DB, et al. (2009) Distinct roles for MyD88 and Toll-like receptor 2 during *Leishmania braziliensis* infection in mice. *Infect Immun* 77: 2948–2956.
69. Watanabe H, Numata K, Ito T, Takagi K, Matsukawa A (2004) Innate immune response in Th1- and Th2-dominant mouse strains. *Shock* 22: 460–466.
70. Oliveira AC, Peixoto JR, de Arruda LB, Campos MA, Gazzinelli RT, et al. (2004) Expression of functional TLR4 confers proinflammatory responsiveness to *Trypanosoma cruzi* glycoinositolphospholipids and higher resistance to infection with *T. cruzi*. *J Immunol* 173: 5688–5696.
71. Falvo JV, Tsytyskova AV, Goldfeld AE (2010) Transcriptional control of the TNF gene. *Curr Dir Autoimmun* 11: 27–60.
72. Jono H, Xu H, Kai H, Lim DJ, Kim YS, et al. (2003) Transforming growth factor-beta-Smad signaling pathway negatively regulates nontypeable *Haemophilus influenzae*-induced MUC5AC mucin transcription via mitogen-activated protein kinase (MAPK) phosphatase-1-dependent inhibition of p38 MAPK. *J Biol Chem* 278: 27811–27819.
73. McNeely TB, Rosen G, Londner MV, Turco SJ (1989) Inhibitory effects on protein kinase C activity by lipophosphoglycan fragments and glycosylphosphatidylinositol antigens of the protozoan parasite *Leishmania*. *Biochem J* 259: 601–604.
74. Mensa-Wilmot K, Garg N, McGwire BS, Lu HG, Zhong L, et al. (1999) Roles of free GPIs in amastigotes of *Leishmania*. *Mol Biochem Parasitol* 99: 103–116.
75. Garami A, Mehlert A, Ilg T (2001) Glycosylation defects and virulence phenotypes of *Leishmania mexicana* phosphomannomutase and dolicholphosphate-mannose synthase gene deletion mutants. *Mol Cell Biol* 21: 8168–8183.
76. Zufferey R, Allen S, Barron T, Sullivan DR, Denny PW, et al. (2003) Ether phospholipids and glycosylphospholipids are not required for amastigote virulence or for inhibition of macrophage activation by *Leishmania major*. *J Biol Chem* 278: 44708–44718.
77. Singh RK, Pandey HP, Sundar S (2006) Visceral leishmaniasis (kala-azar): challenges ahead. *Indian J Med Res* 123: 331–344.
78. Ralton JE, McConville MJ (1998) Delineation of three pathways of glycosylphosphatidylinositol biosynthesis in *Leishmania mexicana*. Precursors from different pathways are assembled on distinct pools of phosphatidylinositol and undergo fatty acid remodeling. *J Biol Chem* 273: 4245–4257.
